# Supplementary material for: Cold Atmospheric Plasma Applications in Viral Inactivation: Systematic Review and Metanalysis
Source: Springer Nature journal article supplement (doi:10.1007/s11090-025-10611-x), 2026-02-09
Supplement: MOESM1 [file 11090_2025_10611_MOESM1_ESM.docx]

| Supplementary table 1 with all documents included in the systematic review | **YEAR** | **DOI** | **AUTHORS** | **TITLE** | **COUNTRY** | **CATEGORY** | **PLASMA SOURCE** | **VIRUS** | **BEST RESULT** |
| --- | --- | --- | --- | --- | --- | --- | --- | --- | --- |
| 1 | 2024 | https://doi.org/10.1002/jmv.29655 | *Ashokkumar et al.* | Human coronavirus 229E inactivation on porous and nonporous materials using dielectric barrier discharge (DBD) plasma | South Korea | Surfaces | Surface DBD | human coronavirus 229E | 3 log reduction |
| 2 | 2024 | https://dx.doi.org/10.36922/ijb.3679 | *Bouazizi A. et al.* | 3D-printed devices for optimized generation of cold atmospheric plasma to improve decontamination of surfaces from respiratory pathogens | Austria | Fundamentals | Corona | SARS-CoV-2, influenza A H1N1, adenovirus, rhinovirus |  |
| 3 | 2024 | [https://doi.org/doi: 10.1063/5.0216072](https://doi.org/doi:%2010.1063/5.0216072) | *Chen Y. et al.* | Interaction mechanism of cold atmospheric plasma and fusion peptides of spike protein in SARS-CoV-2 revealed by reactive molcular dynamics simulation | China | Fundamentals | ND | *SARS-CoV-2 |  |
| 4 | 2024 | <https://doi.org/10.3389/fbioe.2024.1325336> | *Choudhury et al.* | Inactivation of SARS-CoV-2 on porous and nonporous surfaces by compact portable plasma reactor | USA | Surfaces | Surface DBD | SARS-CoV-2 | 5 log reduction (D,NB) |
| 5 | 2024 | <https://doi.org/10.1002/ppap.202300183> | *Lan C. et al.* | Disinfection of viruses with cold atmospheric-pressure plasmas: Sources, mechanisms, and efficacy | China | Reviews |  |  |  |
| 6 | 2024 | <https://doi.org/10.1093/jambio/lxae078> | *Li Y. et al.* | Nonthermal plasma air disinfection for the inactivation of airborne microorganisms in an experimental chamber and indoor air | China | Bioaerosols | DBD | ΦX174 phage | 3 log reduction |
| 7 | 2024 | [https://10.3390/microorganisms12091923](https://10.0.13.62/microorganisms12091923) | *Lim S.W.Y. et al.* | Bioaerosol Inactivation by a Cold Plasma Ionizer Coupled with an Electrostatic Precipitator | Singapore | Bioaerosols | Surface DBD | porcine respiratory coronavirus | 3 log reduction |
| 8 | 2024 | <https://doi.org/10.1016/j.scitotenv.2024.173447> | *Ma et al.* | Effects of chemically-reductive trace gas contaminants on non-thermal plasma inactivation of an airborne virus | USA | Bioaerosols | Packed-bed | MS2 bacteriophage | 1 log reduction |
| 9 | 2024 | https://doi.org/10.3390/pr12071387 | *Nacheva L. et al.* | Cold Atmospheric Plasma (CAP) Treatment of In Vitro Cultivated Plum Plantlets—A Possible Way to Improve Growth and Inactivate Plum Pox Virus (PPV) | Bulgaria | Surfaces | Others | plum pox virus | ND (W, B) |
| 10 | 2024 | https://doi.org/ 10.3390/foods13060850 | *Pandiscia A. et al.* | Leveraging Plasma-Activated Seawater for the Control of Human Norovirus and Bacterial Pathogens in Shellfish Depuration | Italy | PTLs | DBD jet | bacteriophages (MS2 and φ174), murine norovirus, Tulane virus, and human norovirus (HuNoV GII.4) | Full inactivation |
| 11 | 2024 | <https://doi.org/10.1016/j.envpol.2024.123700> | *Patel P. et al.* | Surface air gas discharge plasma: An ecofriendly virus inactivation approach to enhance CPRRs mediated antiviral genes expression against airborne bio-contaminant (human Coronavirus-229E) | South Korea | Fundamentals | Surface DBD | human coronavirus-229E (HCoV-229E) |  |
| 12 | 2024 | https://doi.org/10.1002/advs.202411515 | *Patel P. et al.* | Inactivation of Pseudovirus Expressing the D614G Spike Protein Mutation using Nitric Oxide-Plasma Activated Water | South Korea | Fundamentals | DBD | * SARS-CoV-2 |  |
| 13 | 2024 | <https://doi.org/10.1002/EXP.20230012> | *Qin H. et al.* | Cold atmospheric plasma can effectively disinfect SARS-CoV-2 in the wastewater | China | Liquids | Corona | * SARS-CoV-2 transcription- and replication-competent virus-Like particles (trVLP), coronavirus GX_P2V, porcine epidemic diarrhoea virus | 3 log reduction |
| 14 | 2024 | <https://doi.org/10.1007/s11090-024-10449-9> | *Reema et al.* | Comparative Analysis of Direct Cold Atmospheric Plasma Treatment vs. Plasma Activated Water for the Deactivation of Omicron Variant of SARS-CoV-2 | India | Fundamentals | DBD jet | * SARS-CoV-2 |  |
| 15 | 2024 | https://doi.org/10.1016/j.jhazmat.2024.133458 | *Sheng X. et al.* | Inactivation mechanism of cold plasma combined with 222 nm ultraviolet for spike protein and its application in disinfecting of SARS-CoV-2 | Canada | Fundamentals | Surface DBD + UV lamp | * pseudovirus based on the vesicular stomatitis virus |  |
| 16 | 2024 | https://doi.org/10.1016/j.foodcont.2024.110464 | *Subrahmanyam K. et al.* | Cold plasma-mediated inactivation of microorganisms for the shelf-life extension of animal-based foods: Efficiency, mechanism of inactivation, and impact on quality attributes | India | Reviews |  |  |  |
| 17 | 2024 | <https://doi.org/10.3390/ijms25073839> | *Sutter J. et al.* | Non-Thermal Plasma Reduces HSV-1 Infection of and Replication in HaCaT Keratinocytes In Vitro | USA | Fundamentals | DBD, Surface DBD | herpes simplex virus HSV-1 |  |
| 18 | 2024 | <https://doi.org/10.3389/fphy.2024.1357639> | *Tan S. et al* | Molecular mechanism of cleavage of SARS-CoV-2 spike protein by plasma generated RONS | China | Fundamentals | ND | * SARS-CoV-2 | ND |
| 19 | 2024 | <https://doi.org/10.1109/TPS.2024.3378185> | *Tang A. et al.* | Surface virus inactivation by impinging flow nonthermal plasma reactor | USA | Surfaces | DBD | MS2 bacteriophage | 5.3 log reduction (D, NB) |
| 20 | 2024 | https://doi.org/10.1016/j.foodres.2024.114877 | *Wang F. et al.* | Reactive species of plasma-activated water for murine norovirus 1 inactivation | China | PTLs | Others | Murine norovirus 1 | 6 log reduction |
| 21 | 2024 | <https://doi.org/10.1109/TPS.2023.3297572> | *Xu G. et al.* | Inactivation mechanisms of pulsed corona discharge plasma on Escherichia coli and Staphylococcus aureus phages | China | Fundamentals | Corona | Escherichia coli and Staphylococcus aureus phages |  |
| 22 | 2024 | <https://doi.org/10.1016/j.heliyon.2024.e34337> | *Xu Y. et al.* | Plasma-activated water: Candidate hand disinfectant for SARS-CoV-2 transmission disruption | China | Fundamentals | Plasma jet | * SARS-CoV-2 Pseudovirus |  |
| 23 | 2024 | https://doi.org/10.1186/s12879-024-09886-w | *Zhao H. et al.* | Nebulized inhalation of plasma-activated water in the treatment of progressive moderate COVID-19 patients with antiviral treatment failure: a randomized controlled pilot trial | China | PTLs | Others | SARS-CoV-2 | ND |
| 24 | 2024 | [https://10.3390/horticulturae10040416](https://10.0.13.62/horticulturae10040416) | *Zhou J. et al.* | Tomato Brown Rugose Fruit Virus Is Transmissible through a Greenhouse Hydroponic System but May Be Inactivated by Cold Plasma Ozone Treatment | USA | Liquids | Others | tomato brown rugose fruit virus | Full inactivation |
| 25 | 2024 | <https://doi.org/10.1016/j.jwpe.2024.105194> | *Zhou Z. et al.* | How are SARS-CoV-2 effectively inactivated by plasma activated water? | China | Fundamentals | DBD | SARS-CoV-2 |  |
| 26 | 2023 | https://doi.org/10.3390/ijms241814106 | *Ashokkumar et al.* | Persistence of Coronavirus on Surface Materials and Its Control Measures Using Nonthermal Plasma and Other Agents | South Korea | Reviews |  |  |  |
| 27 | 2023 | https://doi.org/10.3389/finsc.2023.1216291 | *Cook S. et al.* | Deformed wing virus of honey bees is inactivated by cold plasma ionized hydrogen peroxide | USA | PTLs | Corona | deformed wing virus | ~105 - fold reduction in viral infectivity |
| 28 | 2023 | https://doi.org/10.1016/j.envint.2023.108285 | *Filipić A. et al.* | Cold plasma within a stable supercavitation bubble – A breakthrough technology for efficient inactivation of viruses in water | Slovenia | Liquids | Corona | MS2 bacteriophage | 5 log reduction |
| 29 | 2023 | https://doi.org/10.1016/j.jhazmat.2022.130686 | *Guo L. et al.* | Efficient inactivation of the contamination with pathogenic microorganisms by a combination of water spray and plasma-activated air | China | Fundamentals | Others | *SARS-CoV-2 |  |
| 30 | 2023 | https://doi.org/10.1007/s11356-023-30298-x | *Hamza I. A. et al.* | Cold atmospheric plasma: a sustainable approach to inactivating viruses, bacteria, and protozoa with remediation of organic pollutants in river water and wastewater | Egypt | Liquids | Corona | PhiX174, rotavirus | Full inactivation |
| 31 | 2023 | <https://doi.org/10.1111/1541-4337.13192> | *Han S. et al.* | Innovative nonthermal technologies for inactivation of emerging foodborne viruses | South Korea | Reviews |  |  |  |
| 32 | 2023 | <https://doi.org/10.1038/s41598-023-37014-2> | *Jangra R. et al.* | Efficient deactivation of aerosolized pathogens using a dielectric barrier discharge based cold-plasma detergent in environment device for good indoor air qualitys | India | Bioaerosols | Surface DBD | MS2 bacteriophage | 5 log reduction |
| 33 | 2023 | https://doi.org/10.1016/j.bioactmat.2022.05.005 | *Kaushik N. et al.* | Nitric-oxide enriched plasma-activated water inactivates 229E coronavirus and alters antiviral response genes in human lung host cells | South Korea | Fundamentals | Others | human coronavirus-229E (HCoV-229E) |  |
| 34 | 2023 | https://doi.org/10.1016/j.jare.2022.03.002 | *Kaushik N. et al.* | The inactivation and destruction of viruses by reactive oxygen species generated through physical and cold atmospheric plasma techniques: Current status and perspectives | South Korea | Reviews |  |  |  |
| 35 | 2023 | <https://doi.org/10.1080/10408398.2022.2077298> | *Kulawik et al.* | Recent developments in the use of cold plasma, high hydrostatic pressure, and pulsed electric fields on microorganisms and viruses in seafood | China | Reviews |  |  |  |
| 36 | 2023 | https://doi.org/10.1016/j.jece.2023.110728 | *Li J. et al.* | Plasma air filtration system for intercepting and inactivation of pathogenic microbial aerosols | Australia | Bioaerosols | Others | H1N1 | 2.2 log reduction |
| 37 | 2023 | <https://doi.org/10.3390/biomedicines11010122> | *Mohamed H. et al.* | Immunomodulatory Effects of Non-Thermal Plasma in a Model for Latent HIV-1 Infection: Implications for an HIV-1-Specific Immunotherapy | USA | Fundamentals | DBD | * human immunodeficiency virus type 1 (HIV-1) |  |
| 38 | 2023 | <https://doi.org/10.1002/ppap.202300046> | *Ruiz-Trujillo S. et al.* | Electrohydrodynamic devices for ionic wind generation and airborne positive‐strand RNA viruses inactivation by nonthermal atmospheric plasma | Spain | Bioaerosols | Corona | SARS-CoV-2, human coronavirus 229E, MS2 bacteriophage | 3.4 log reduction, 2.4 log reduction, 2.4 log reduction |
| 39 | 2023 | https://doi.org/10.1021/acssuschemeng.2c07622 | *Sahun M. et al.* | Inactivation of SARS-CoV‑2 and Other Enveloped and Non-Enveloped Viruses with Non-Thermal Plasma for Hospital Disinfection | Belgium | Fundamentals | DBD | SARS-CoV-2, porcine respiratory coronavirus, coxsackievirus B3 |  |
| 40 | 2023 | https://doi.org/10.3390/ foods12051030 | *Song M.G. et al.* | Inactivation of Human Norovirus GII.4 and Vibrio parahaemolyticus in the Sea Squirt (Halocynthia roretzi) by Floating Electrode-Dielectric Barrier Discharge Plasma | South Korea | Surfaces | DBD | Human norovirus | 1.26 log reduction (W,B) |
| 41 | 2023 | https://doi.org/10.3390/app13063513 | *Song M.G. et al.* | Antiviral Efficacy of Dielectric Barrier Discharge Plasma against Hepatitis A Virus in Fresh Oyster Using PMA/RT-qPCR | South Korea | Surfaces | Surface DBD | Hepatitis A Virus | 1.11 log reduction (W, B) |
| 42 | 2023 | https://doi.org/10.3390/ijms24054673 | *Sutter at al.* | Manipulation of Oxidative Stress Responses by Non-Thermal Plasma to Treat Herpes Simplex Virus Type 1 Infection and Disease | USA | Reviews |  |  |  |
| 43 | 2023 | <https://doi.org/10.3390/bioengineering10030280> | *Thomas S. V. et al.* | Inactivation of SARS-CoV-2 on Surfaces by Cold-Plasma-Generated Reactive Species | USA | Fundamentals | DBD jet | * SARS-CoV-2 pseudotyped lentivirus |  |
| 44 | 2023 | https://doi.org/10.1093/jambio/lxad181 | *Upadrasta A. et al.* | In situ g ener ation of cold atmospheric plasma-activated mist and its biocidal activity against surrogate viruses for COVID-19 | Ireland | PTLs | Corona jet | Phi6, PhiX174, MS2 bacteriophage | 7.4 log reduction, 3.1 log reduction, 1.26 log reduction |
| 45 | 2023 | <https://doi.org/10.1615/PlasmaMed.2023051186> | *Wang H. et al.* | Application of NaCl in Cold Atmospheric Plasma Jet and Plasma-Activated Solution to Enhance Virus Inactivation | China | Fundamentals | DBD jet | MS2 bacteriophage |  |
| 46 | 2023 | <https://doi.org/10.1002/ppap.202200242> | *Yang Z. et al.* | Damage of SARS-CoV-2 spike protein by atomic oxygen of cold atmospheric plasma: A molecular dynamics study | China | Fundamentals | ND | *SARS-CoV-2 |  |
| 47 | 2023 | https://doi.org/10.1007/s13762-022-04399-y | *Yaramhmadi R. et al.* | Inactivation of airborne SARS-CoV-2 using NTP-UVGI hybrid process | Iran | Bioaerosols | Others | SARS-CoV-2 | ND |
| 48 | 2023 | https://doi.org/10.1016/j.jwpe.2023.103839 | *Zver M. et al.* | Non-thermal plasma inactivation of viruses in water solutions | Slovenia | Reviews |  |  |  |
| 49 | 2022 | https://doi.org/10.1038/s41598-022-13444-2 | *Abdel-Wahed M.S. et al.* | Removal of chemical and microbial water pollutants by cold plasma combined with Ag/TiO2-rGO nanoparticles | Egypt | Liquids | Corona | PhiX174 bacteriophage, adenovirus, rotavirus | 5.5 log reduction, 6 log reduction, 4.3 log reduction |
| 50 | 2022 | https://doi.org/10.1007/s11356-021-17486-3 | *Assadi I. et al.* | Review on inactivation of airborne viruses using non-thermal plasma technologies: from MS2 to coronavirus | France | Reviews |  |  |  |
| 51 | 2022 | https://doi.org/10.1021/acsapm.2c01086 | *Baek K.H. et al.* | Polyimide Surface Dielectric Barrier Discharge for Inactivation of SARS-CoV‑2 Trapped in a Polypropylene Melt-Blown Filter | South Korea | Surfaces | Surface DBD | SARS-CoV-2 | 2.7 log reduction (D, NB) |
| 52 | 2022 | <https://doi.org/10.1016/j.envres.2021.111765> | *Berry G. et al.* | A review of methods to reduce the probability of the airborne spread of COVID-19 in ventilation systems and enclosed spaces | USA | Reviews |  |  |  |
| 53 | 2022 | https://doi.org/10.1002/ppap.202200054 | *Bhartiya P. et al.* | Nonthermal plasma-generated ozone inhibits human coronavirus 229E infectivity on glass surface | South Korea | Surfaces | DBD | human coronavirus 229E | 2.1 log reduction (D, NB) |
| 54 | 2022 | https://doi.org/10.1002/ppap.202100133 | *Bisag et al.* | Cold atmospheric plasma decontamination of SARS-CoV-2 bioaerosols | Italy | Bioaerosols | DBD | SARS-CoV-2 | Full inactivation |
| 55 | 2022 | https://doi: 10.1002/ppap.202200012 | *Chen Z. et al.* | Cold atmospheric plasma for addressing the COVID-19 pandemic | USA | Reviews |  |  |  |
| 56 | 2022 | https://doi.org/10.1038/s41598-021-04360-y | *Cortázar O.D. et al.* | Vulnerability of SARS-CoV-2 and PR8 H1N1 virus to cold atmospheric plasma activated media | Spain | PTLs | DBD jet | SARS-CoV-2, influenzavirus A PR8 H1N1 | / |
| 57 | 2022 | https://doi.org 10.1111/1541-4337.12909 | *Ezzatpanah H. et al.* | New food safety challenges of viral contamination from a global perspective: Conventional, emerging, and novel methods of viral control | Finland | Reviews |  |  |  |
| 58 | 2022 | https://doi.org/10.1016/j.chemosphere.2022.136655 | *Fu J. et al.* | Viral disinfection using nonthermal plasma: A critical review and perspectives on the plasma-catalysis system | Canada | Reviews |  |  |  |
| 59 | 2022 | https://doi: 10.1007/s11356-022-21160-7 | *Guesmi A. et al.* | Disinfection of corona and myriad viruses in water by non-thermal plasma: a review | France | Reviews |  |  |  |
| 60 | 2022 | https://doi.org/10.3390/v14122685 | *Han I. et al.* | Nonthermal Biocompatible Plasma Inactivation of Coronavirus SARS-CoV-2: Prospects for Future Antiviral Applications | South Korea | Reviews |  |  |  |
| 61 | 2022 | https://doi.org/10.7150/ijbs.71983 | *Han P. et al.* | Cold Atmospheric Plasma Boosts Virus Multiplication via EGFR(Tyr1068) Phosphorylation-Mediated Control on Cell Mitophagy | China | Fundamentals | DBD jet | infectious bovine rhinotracheitis virus (IBRV) |  |
| 62 | 2022 | https://doi.org/10.1038/s41598-022-23660-5 | *He J.J. et al.* | Plasma-generated reactive water mist for disinfection of N95 respirators laden with MS2 and T4 bacteriophage viruses | USA | Surfaces | DBD | MS2 Bacteriophage, T4 bacteriophage | 2 log reduction (D, NB), 3 log reduction (D, NB) |
| 63 | 2022 | https://doi.org/10.1016/j.tifs.2022.04.006 | *Jenns K. et al.* | Inactivation of foodborne viruses: Opportunities for cold atmospheric plasma | Australia | Reviews |  |  |  |
| 64 | 2022 | https://doi.org/10.1039/D2RA00009A | *Khanikar R.R. et al.* | Cold atmospheric pressure plasma for attenuation of SARS-CoV-2 spike protein binding to ACE2 protein and the RNA deactivation | India | Fundamentals | DBD jet | * SARS-CoV-2 |  |
| 65 | 2022 | https://doi: 10.1111/jam.15599 | *Kramer B. et al.* | Disinfection of an ambulance using a compact atmospheric plasma device | Germany | Surfaces | DBD | Φ6 bacteriophage | > 4.4 log reduction (D, NB) |
| 66 | 2022 | https://doi.org/10.3390/covid2100100 | *Loizou C. et al.* | Effect of cold atmospheric plasma on SARS-CoV-2 invativation: a pilot study in the hospital einvironment | Cyprus | Bioaerosols | DBD | SARS-CoV-2 | ND |
| 67 | 2022 | https://doi.org/10.1016/j.freeradbiomed.2022.08.026 | *Mrochen D.M. et al.* | Toxicity and virucidal activity of a neon-driven micro plasma jet on eukaryotic cells and a coronavirus | Germany | Fundamentals | DBD jet | murine hepatitis virus |  |
| 68 | 2022 | <https://doi.org/10.1007/s11090-022-10269-9> | *Nagar V. et al.* | Evaluation of Virucidal Efficacy of Cold Plasma on Bacteriophage Inside a Three-Layered Sterilization Chamber | India | Surfaces | Others | P2 bacteriophage | > 2 log reduction (ND) |
| 69 | 2022 | http://dx.doi.org/10.4274/mjima.galenos.2021.2021.12 | *Nikmaram A. et al.* | The application of non-chloride-based disinfectants in inactivation of sars-cov-2 in personal protective equipment, air and surfaces of hospitals | Cyprus | Reviews |  |  |  |
| 70 | 2022 | https://doi.org/10.33640/2405-609X.3234 | *Nur M. et al.* | A Successful Elimination of Indonesian SARS-CoV-2 Variants and Airborne Transmission Prevention by Cold Plasma in Fighting COVID-19 Pandemic: A Preliminary Study | Indonesia | Bioaerosols | Others | SARS-CoV-2 | 23% of viral load reduction |
| 71 | 2022 | https://doi.org/10.3389/fbioe.2022.815393 | *Obrová K. et al.* | Decontamination of High-Efficiency Mask Filters from Respiratory Pathogens Including SARS-CoV-2 by Non-thermal Plasma | Austria | Surfaces | Corona | SARS-CoV-2, adenovirus, rhinovirus, influenza A virus H1N1 | Full inactivation (D, NB) |
| 72 | 2022 | https://10.3390/buildings12101587 | *Pourchez J. et al.* | Antimicrobial Performance of an Innovative Technology of Atmospheric Plasma Reactors against Bioaerosols: Effectiveness in Removing Airborne Viable Viruses | France | Bioaerosols | Others | Phage phi-11 | 6 log reduction |
| 73 | 2022 | https://doi.org/10.1016/j.jhazmat.2022.128414 | *Qin H. et al.* | Efficient disinfection of SARS-CoV-2-like coronavirus, pseudotyped SARS-CoV-2 and other coronaviruses using cold plasma induces spike protein damage | China | PTLs | DBD jet | pangolin coronavirus GX , porcine epidemic diarrhea virus | Inhibition rate > 99% |
| 74 | 2022 | https://doi:10.1088/1361-6463/ac6a8c | *Sasaki S. et al.* | Human coronavirus inactivation by atmospheric pressure helium plasma | Japan | Fundamentals | Corona jet | human coronavirus 229E |  |
| 75 | 2022 | https://doi.org/10.1016/j.jhazmat.2021.126906 | *Song K. et al.* | Inactivation efficacy and mechanism of pulsed corona discharge plasma on virus in water | China | Liquids | Corona | spring viremia of carp virus | 4 log reduction |
| 76 | 2022 | https://doi.org/10.1111/jfs.12988 | *Thirumdas R.* | Inactivation of viruses related to foodborne infections using cold plasma technology | India | Reviews |  |  |  |
| 77 | 2022 | https://doi.org/10.3390/pr10030554 | *Todorova Y. et al.* | Non-Thermal Atmospheric Plasma for Microbial Decontamination and Removal of Hazardous Chemicals: An Overview in the Circular Economy Context with Data for Test Applications of Microwave Plasma Torch | Bulgaria | Reviews |  |  |  |
| 78 | 2022 | https://doi.org/10.1016/j.ifset.2022.103121 | *Velebit B. et al.* | Efficacy of cold atmospheric plasma for inactivation of viruses on raspberries | Croatia | Surfaces | Corona | murine norovirus, hepatitis A virus (HAV) | 4 log reduction (W, B) |
| 79 | 2022 | https://doi.org/10.1002/ppap.202200196 | *Von Woedtke T. et al.* | Oral SARS-CoV-2 reduction by local treatment: A plasma technology application? | Germany | Reviews |  |  |  |
| 80 | 2022 | https://doi.org/10.1088/1361-6463/ac360e | *Wang H. et al.* | Reactive force field-based molecular dynamics simulation of the interaction between plasma reactive oxygen species and the receptor-binding domain of the spike protein in the capsid protein of SARS-CoV-2 | China | Fundamentals |  |  |  |
| 81 | 2022 | https://doi.org/ 10.7150/thno.70098 | *Wang P. et al.* | Cold atmospheric plasma for preventing infection of viruses that use ACE2 for entry | China | PTLs | DBD jet | SARS-CoV-2 | / |
| 82 | 2022 | <https://doi.org/10.1016/j.nbt.2021.10.001> | *Wolfgruber S. et al.* | SARS-CoV-2 neutralizing activity of ozone on porous and non-porous materials | Austria | Surfaces | Others | SARS-CoV-2 | 6 log reduction (W, NB) |
| 83 | 2021 | <https://doi.org/10.1109/TPS.2021.3099868> | *Bute A. et al.* | Effect of Water Vapor on the Virucidal Behavior of RF-Hollow Cathode Cold Plasma: A Study by Optical Emission Spectroscopy | India | Fundamentals | Others | Aeromonas bacteria bacteriophage |  |
| 84 | 2021 | https://doi.org/10.3390/app11094177 | *Capelli et al.* | Decontamination of food packages from SARS-COV-2 RNA with a cold plasma-assisted system | Italy | Fundamentals | Surface DBD | * SARS-CoV-2 |  |
| 85 | 2021 | https://doi.org/10.3390/life11121333 | *Csadek I. et al.* | Nitrogen Accumulation in Oyster (Crassostrea gigas) Slurry Exposed to Virucidal Cold Atmospheric Plasma Treatment | Austria | Fundamentals | Surface DBD | bovine coronavirus BCoV, equid alhaherpesvirus (EHV-1) |  |
| 86 | 2021 | https://doi.org/10.1002/slct.202004716 | *El-Kalliny A.S. et al.* | Efficacy of Cold Atmospheric Plasma Treatment on Chemical and Microbial Pollutants in Water | Egypt | Liquids | Corona | rotavirus, phiX174 | 4.3 log reduction, 5 log reduction |
| 87 | 2021 | https://doi.org/10.3389/fmicb.2021.618209 | *Filipić A. et al.* | Inactivation of Pepper Mild Mottle Virus in Water by Cold Atmospheric Plasma | Slovenia | Liquids | Corona jet | pepper mild mottle virus | Full inactivation |
| 88 | 2021 | https://doi.org/10.1088/1361-6595/abf51b | *Gao H. et al.* | Atmospheric-pressure non-equilibrium plasmas for effective abatement of pathogenic biological aerosols | Australia | Reviews |  |  |  |
| 89 | 2021 | https://doi.org/10.1016/j.cej.2020.127742 | *Guo L. et al.* | Plasma-activated water: An alternative disinfectant for S protein inactivation to prevent SARS-CoV-2 infection | China | Fundamentals | Surface DBD | * SARS-CoV-2 |  |
| 90 | 2021 | https://doi.org/10.1007/s11356-021-16741-x | *Gururani P. et al.* | Cold plasma technology: advanced and sustainable approach for wastewater treatment | India | Reviews |  |  |  |
| 91 | 2021 | https://doi.org/10.1016/j.foodres.2021.110108 | *Huang Y.M. et al.* | Inactivation of norovirus by atmospheric pressure plasma jet on salmon sashimi | Taiwan | Surfaces | Corona jet | human norovirus | Full inactivation (W, B) |
| 92 | 2021 | https:// doi: 10.1063/5.0060530 | *Jin et al.* | Cold atmospheric plasma: A non-negligible strategy for viral RNA inactivation to prevent SARS-CoV-2 environmental transmission | China | Fundamentals | DBD | *SARS-CoV-2 |  |
| 93 | 2021 | https://doi.org/10.3390/foods10061214 | *Lee E.S. et al.* | Microbial inactivation and quality preservation of chicken breast salad using atmospheric dielectric barrier discharge cold plasma treatment | South Korea | Surfaces | DBD | Tulane virus | 1 log reduction (D, NB) |
| 94 | 2021 | https://doi.org/10.1080/21505594.2021.1883933 | *Miao Y. et al..* | Cold atmospheric plasma increases IBRV titer in MDBK cells by orchestrating the host cell network | China | Fundamentals | DBD jet | bovine rhinotracheitis virus |  |
| 95 | 2021 | https://doi.org/10.1371/journal.pone.0247125 | *Mohamed H. et al.* | Non-thermal plasma modulates cellular markers associated with immunogenicity in a model of latent HIV-1 infection | USA | Fundamentals | DBD jet | *human Immunodeficiency Virus type 1 (HIV-1) |  |
| 96 | 2021 | https://doi.org/10.3389/fphy.2021.683118 | *Mohamed H. et al.* | Non-Thermal Plasma as a Novel Strategy for Treating or Preventing Viral Infection and Associated Disease | USA | Reviews |  |  |  |
| 97 | 2021 | https://doi.org/10.1111/jfs.12919 | *Mohammadi et al.* | Inactivation of viruses using nonthermal plasma in viral suspensions and foodstuff: A short review of recent studies | Iran | Reviews |  |  |  |
| 98 | 2021 | https://doi.org/10.1063/5.0062787 | *Szili E.J. et al.* | On-demand cold plasma activation of acetyl donors for bacteria and virus decontamination | UK | Fundamentals | DBD jet | SARS-CoV-2 |  |
| 99 | 2021 | https://doi.org/10.3390/biomedicines9091259 | *Yan D. et al.* | Multi-modal biological destruction by cold atmospheric plasma: Capability and mechanism | USA | Reviews |  |  |  |
| 100 | 2020 | <https://doi.org/10.1016/j.fm.2019.103307> | *Aboubakr H. A. et al.* | Ìn situ inactivation of human norovirus GII.4 by cold plasma: Ethidium monoazide (EMA)-coupled RT-qPCR underestimates virus reduction and fecal material suppresses inactivation | USA | Surfaces | Surface DBD | human norovirus, feline calicivirus | 2.9 log reduction, >5 log reduction (W, NB,B) |
| 101 | 2020 | https://doi.org/10.4315/JFP-20-177 | *Ahmed H. et al.* | Reduction of Norovirus in Foods by Nonthermal Treatments: A review | Finland | Reviews |  |  |  |
| 102 | 2020 | https://doi.org/10.1109/MERCon50084.2020.9185237 | *Bekeschus et al.* | Gas Plasma Technology-An Asset to Healthcare during Viral Pandemics Such as the COVID-19 Crisis? | Italy | Reviews |  |  |  |
| 103 | 2020 | https://doi.org/10.1002/ppap.202000154 | *Bisag et al.* | Cold atmospheric plasma inactivation of aerosolized microdroplets containing bacteria and purified SARS-CoV-2 RNA to contrast airborne indoor transmission | Italy | Fundamentals | DBD | * SARS-CoV-2 |  |
| 104 | 2020 | https://doi.org/10.1099/jgv.0.001382 | *Bunz O. et al.* | Cold atmospheric plasma as antiviral therapy – effect on human herpes simplex virus type 1 | Germany | Fundamentals | DBD jet | herpses simplex virus 1 - HSV-1 |  |
| 105 | 2020 | <https://doi.org/10.1063/5.0031332> | *Chen Z. et al.* | Cold atmospheric plasma for SARS-CoV-2 inactivation | USA | Surfaces | DBD jet | SARS-CoV-2 | Full inactivation (D, NB) |
| 106 | 2020 | https://doi.org/10.3390/foods9121731 | *Choi M. S. et al.* | Virucidal Effects of Dielectric Barrier Discharge Plasma on Human Norovirus Infectivity in Fresh Oysters (Crassostrea gigas) | South Korea | Surfaces | DBD | norovirus | 1.68 log reduction (W, B) |
| 107 | 2020 | https://doi.org/10.1016/j.tibtech.2020.04.003 | *Filipić A. et al.* | Cold Plasma, a New Hope in the Field of Virus Inactivation | Slovenia | Reviews |  |  |  |
| 108 | 2020 | https://doi.org/10.1007/s00253-019-10106-8 | *Hongzhuan Z. et al.* | Preparation of the inactivated Newcastle disease vaccine by plasma activated water and evaluation of its protection efficacy | China | Fundamentals | DBD jet | Newcastle disease virus |  |
| 109 | 2020 | https://doi.org/10.3390/app10186301 | *Lee E.S. et al.* | Evaluation of in-package atmospheric dielectric barrier discharge cold plasma treatment as an intervention technology for decontaminating bulk ready-to-eat chicken breast cubes in plastic containers | South Korea | Surfaces | DBD | Tulane virus | 1.08 log reduction (D, B) |
| 110 | 2020 | https://doi.org/10.1088/1361-6463/aba066 | *Moldgy A. et al.* | Inactivation of virus and bacteria using cold atmospheric pressure air plasmas and the role of reactive nitrogen species | USA | Surfaces | DBD, 2D DBD, volumetric DBD, gliding arc | felice calicivirus | > 4 log reduction (W, D, NB) |
| 111 | 2020 | https://doi.org/10.1002/ppap.201900234 | *Moldgy A. et al.* | Comparative evaluation of the virucidal effect of remote and direct cold air plasmas with UV-C | USA | Surfaces | Surface DBD, DBD, 2D DBD | feline calicivirus | Full inactivation (W, NB) |
| 112 | 2020 | https://doi.org/10.1002/ppap.201900269 | *Nayak et al.* | Rapid inactivation of airborne porcine reproductive and respiratory syndrome virus using an atmospheric pressure air plasma | USA | Bioaerosols | Volumetric DBD | porcine reproductive and respiratory syndrome virus (PRRSv) | 3.5 log reduction |
| 113 | 2020 | https://doi.org/10.3390/foods9111520 | *Pexara A. et al.* | Foodborne viruses and innovative non-Thermal food-Processing technologies | Greece | Reviews |  |  |  |
| 114 | 2020 | https://doi.org/10.1016/j.lwt.2020.109429 | *Roh S.H. et al.* | Inactivation of Escherichia coli O157:H7, Salmonella, Listeria monocytogenes, and Tulane virus in processed chicken breast via atmospheric in-package cold plasma treatment | South Korea | Surfaces | DBD | Tulane virus | 2.2 log reduction (D, B) |
| 115 | 2020 | https://doi.org/10.13031/aea.13699 | *Schiappacasse C. et al.* | Inactivation of Aerosolized Newcastle Disease Virus with Non-thermal Plasma | USA | Bioaerosols | DBD | Newcastle disease virus | Full inactivation |
| 116 | 2020 | https://doi.org/10.3390/foods9101435 | *Varilla C. et al.* | Potential of cold plasma technology in ensuring the safety of foods and agricultural produce: A review | USA | Reviews |  |  |  |
| 117 | 2020 | https://doi.org/10.1016/j.jhazmat.2020.122266 | *Xia T. et al.* | Inactivation of airborne porcine reproductive and respiratory syndrome virus (PRRSv) by a packed bed dielectric barrier discharge non-thermal plasma | USA | Bioaerosols | Packed Bed NTP | porcine reproductive and respiratory syndrome virus (PRRSv) | 1.3 log reduction |
| 118 | 2019 | https://doi.org/ 10.1007/s12560-019-09388-y | *Filipić A. et al.* | Cold Atmospheric Plasma as a Novel Method for Inactivation of Potato Virus Y in Water Samples | Slovenia | Liquids | Corona jet | potato virus Y | Full inactivation |
| 119 | 2019 | https://doi.org/10.33073/pjm-2019-028 | *Niedzwiedz et al.* | The state of research on antimicrobial activity of cold plasma | Poland | Reviews |  |  |  |
| 120 | 2019 | https://doi.org/10.1109/IAS.2019.8912457 | *Xia T. et al.* | Field Operations of a Pilot Scale Packed-bed Non-thermal Plasma (NTP) Reactor Installed at a Pig Barn on a Michigan Farm to Inactivate Airborne Viruses | USA | Bioaerosols | Packed Bed NTP | porcine reproductive and respiratory syndrome virus (PRRSv) | ND |
| 121 | 2019 | [https://doi.org/ 10.1088/1361-6463/ab1466](https://doi.org/%2010.1088/1361-6463/ab1466) | *Xia T. et al.* | Inactivation of airborne viruses using a packed bed non-thermal plasma reactor | USA | Bioaerosols | Packed Bed NTP | MS2 phage | 2.3 log reduction |
| 122 | 2018 | https://doi.org/10.1371/journal.pone.0194618 | *Aboubakr H.A. et al.* | Cold argon-oxygen plasma species oxidize and disintegrate capsid protein of feline calicivirus | USA | Fundamentals | DBD jet | feline Calicivirus |  |
| 123 | 2018 | https://doi.org/10.1371/journal.pone.0202352 | *Bunz et al.* | Effect of cold atmospheric plasma (CAP) on human adenoviruses is adenovirus type-dependent | Germany | Fundamentals | DBD jet | human adenoviruses (HAdVs) |  |
| 124 | 2018 | <https://doi.org/10.1128/AEM.00726-18> | *Guo L. et al.* | Mechanism of virus inactivation by cold atmospheric-pressure plasma and plasma activated water | China | Fundamentals | Surface DBD | bacteriophages T4, phi174, and MS2 |  |
| 125 | 2018 | https://doi.org/10.1007/s00705-018-3909-4 | *Hanbal S. E. et al.* | Atmospheric-pressure plasma irradiation can disrupt tobacco mosaic virus particles and RNAs to inactivate their infectivity | Japan | Fundamentals | DBD | tobacco mosaic virus (TMV) |  |
| 126 | 2018 | https://doi.org/10.1128/AEM.02836-17 | *Su et al.* | Inactivation Efficacy of Nonthermal Plasma-Activated Solutions against Newcastle Disease Virus | China | PTLs | DBD jet | Newcastle disease virus (NDV) | Full inactivation |
| 127 | 2018 | <https://DOI:10.1038/s41598-018-36779-1> | *Yamashiro R. et al.* | Key role of singlet oxygen and peroxynitrite in viral RNA damage during virucidal effect of plasma torch on feline calicivirus | Japan | Fundamentals | DBD | feline calicivirus |  |
| 128 | 2017 | https://doi.org/10.1615/PlasmaMed.2017019479 | *Brun P. et al.* | Mechanisms of wound healing and disinfection in a plasma source for the treatment of corneal infections | Italy | Fundamentals | DBD jet | herpses simplex virus 1 - HSV-1 |  |
| 129 | 2017 | http://dx.doi.org/10.1016/j.jaerosci.2017.02.004 | *Hyun J. et al.* | Application of corona discharge-generated air ions for filtration of aerosolized virus and inactivation filtered virus | South Korea | Bioaerosols | Others | MS2 bacteriophage | 1,6 log reduction |
| 130 | 2017 | https://doi.org/10.1016/j.fm.2016.10.030 | *Lacombe A. et al.* | Nonthermal inactivation of norovirus surrogates on blueberries using atmospheric cold plasma | USA | Surfaces | Others | Tulane virus, murine norovirus (MNV) | 3.5 log reduction, 5 log reduction (W, B) |
| 131 | 2017 | https://doi.org/10.1002/ppap.201700119 | *Nayak et al.* | Reactive species responsible for the inactivation of feline calicivirus by a two-dimensional array of integrated coaxial microhollow dielectric barrier discharges in air | USA | Surfaces | DBD | feline Calicivirus | Full incativation (W, D, NB) |
| 132 | 2017 | http://dx.doi.org/10.1016/j.msec.2017.02.007 | *Sakudo A. et al.* | Crucial roles of reactive chemical species in modification of respiratory syncytial virus by nitrogen gas plasma | Japan | Fundamentals | Others |  | respiratory syncytial virus (RSV) |
| 133 | 2017 | https://doi.org/10.1002/jmv.24701 | *Weiss M. et al.* | Virucide properties of cold atmospheric plasma for future clinical applications | Germany | Reviews |  |  |  |
| 134 | 2016 | https://doi.org/10.1088/0022-3727/49/20/204001 | *Aboubakr H. A. et al.* | Inactivation of virus in solution by cold atmospheric pressure plasma: Identification of chemical inactivation pathways | USA | Fundamentals | DBD jet | feline calicivirus |  |
| 135 | 2016 | <http://dx.doi.org/10.1016/j.watres.2016.06.052> | *Lee E.J. et al.* | Arc discharge-mediated disassembly of viral particles in water | South Korea | Liquids | Corona | murine norovirus | 4.4 log reduction |
| 136 | 2016 | <https://doi.org/10.1016/j.ijfoodmicro.2016.08.025> | *Min S. et al.* | Dielectric barrier discharge atmospheric cold plasma inhibits Escherichia coli O157:H7, Salmonella, Listeria monocytogenes, and Tulane virus in Romaine lettuce | USA | Surfaces | DBD | Tulane virus | 1.3 log reduction (W, B) |
| 137 | 2016 | <https://doi.org/10.1371/journal.pone.0157922> | *Sakudo A. et al.* | Nitrogen gas plasma generated by a static induction thyristor a pulsed power supply inactivates adenovirus | Japan | Fundamentals | Others | Adenovirus |  |
| 138 | 2016 | https://doi.org/10.1007/s11356-021-17486-3 | *Puligundla et al.* | Non-thermal plasmas (NTPs) for inactivation of viruses in abiotic environment | South Korea | Reviews |  |  |  |
| 139 | 2016 | <https://doi.org/10.1371/journal.pone.0165322> | *Volotskova et al.* | Cold atmospheric plasma inhibits HIV-1 replication in macrophages by targeting both the virus and the cells | USA | Fundamentals | DBD jet | human Immunodeficiency Virus type 1 (HIV-1) |  |
| 140 | 2016 | https://doi.org/10.1016/j.vaccine.2015.10.099 | *Wang G. et al.* | Non-thermal plasma for inactivated-vaccine preparation | China | Fundamentals | Corona jet | Newcastle disease virus, H9N2 avian influenza virus |  |
| 141 | 2015 | https://doi.org/10.1128/AEM.00054-15 | *Aboubakr H. A. et al.* | Virucidal effect of cold atmospheric gaseous plasma on feline calicivirus, a surrogate for human norovirus | USA | Fundamentals | DBD jet | feline calicivirus |  |
| 142 | 2015 | https://doi.org/10.1128/mBio.02300-14 | *Ahlfeld B. et al.* | Inactivation of a foodborne norovirus outbreak strain with nonthermal atmospheric pressure plasma | Germany | Surfaces | Surface DBD | human norovirus | 1.69 log reduction (W, B) |
| 143 | 2015 | https://doi.org/10.1016/j.foodres.2015.06.039 | *Bae S. C. et al.* | Inactivation of murine norovirus-1 and hepatitis A virus on fresh meats by atmospheric pressure plasma jets | South Korea | Surfaces | Corona jet | murine norovirus (MNV-1), hepatitis A virus (HAV) | 2 log reduction (W, B) |
| 144 | 2015 | http://dx.doi.org/10.1016/j.bmcl.2015.03.036 | *Sakudo A. et al.* | Integration of antibody by surface functionalization of graphite-encapsulated magnetic beads using ammonia gas plasma technology for capturing influenza A virus | Japan | Fundamentals | Others | influenza A virus |  |
| 145 | 2015 | https://doi.org/10.1128/AEM.03322-14 | *Wu Y. et al.* | MS2 virus inactivation by atmospheric-pressure cold plasma using different gas carriers and power levels | USA | Bioaerosols | DBD | MS2 bacteriophages | > 2 log reduction |
| 146 | 2014 | http://tvstjournal.org/doi/full/10.1167/tvst.3.2.2 | *Alekseev O. et al.* | Nontherma dielectric barrier discharge (DBD) plasma suppress herpes simplex virus type 1 (HSV-1) replication in corneal epithelium | USA | PTLs | DBD | herpes simplex virus - 1 (HSV-1) | ND |
| 147 | 2014 | http://dx.doi.org/10.1016/j.cpme.2014.07.001 | *Isbary G. et al.* | Randomized placebo-controlled clinical trial showed cold atmospheric argon plasma relieved acute pain and accelerated healing in herpes zoster | Germany | Surfaces | Others | varicella-zoster virus | ND |
| 148 | 2014 | https://doi.org/10.2741/e692 | *Sakudo A. et al.* | N2 gas plasma inactivates influenza virus mediated by oxidative stress | Japan | Fundamentals | Others | influenza A virus H1N1 and influenza B |  |
| 149 | 2014 | https://doi.org/10.1109/TIA.2013.2274260 | *Tanaka et al.* | Analysis of the Inactivation Mechanism of Bacteriophage phi X174 by Atmospheric Pressure Discharge Plasma | Japan | Fundamentals | DBD | phiX174 |  |
| 150 | 2013 | https://doi.org/10.1111/jam.12331 | *Alshraiedeh N. H. et al.* | Atmospheric pressure, nonthermal plasma inactivation of MS2 bacteriophage: Effect of oxygen concentration on virucidal activity | UK | Fundamentals | DBD jet | MS2 bacteriophages |  |
| 151 | 2013 | http://dx.doi.org/10.1155/2013/694269 | *Sakudo A. et al.* | N2 Gas plasma inactivates influenza virus by inducing changes in viral surface morphology, protein, and genomic RNA | Japan | Fundamentals | Others | influenza A virus H1N1 and Influenza B |  |
| 152 | 2012 | https://doi.org/10.1371/journal.pone.0033245 | *Braun P. et al.* | Disinfection of ocular cells and tissues by atmospheric-pressure cold plasma | Italy | Fundamentals | DBD jet | herpes simplex virus-1 - HSV-1 |  |
| 153 | 2012 | <https://doi.org/10.1109/TPS.2012.2210567> | *Shi X.M. et al.* | Effect of Low-Temperature Plasma on Deactivation of Hepatitis B Virus | China | Fundamentals | DBD | hepatitis B virus (HBV) |  |
| 154 | 2011 | <https://doi.org/10.4028/www.scientific.net/AMR.183-185.2232> | *Huang Y.C. et al.* | Removal efficiency of virus aerosols using carbon nanotube plasma | Taiwan | Bioaerosols | Corona | Phage λ | 1.05 log reduction |
| 155 | 2011 | <https://doi.org/10.1016/j.chemosphere.2010.11.036> | *Lee C. et al.* | Inactivation of MS2 bacteriophage by streamer corona discharge in water | South Korea | Liquids | Corona | MS2 bacteriophage | 4 log reduction |
| 156 | 2011 | https://doi.org/10.1063/1.3669534 | *Xiong Z. et al* | Room-temperature, atmospheric plasma needle reduces adenovirus gene expression in HEK 293A host cells | China | Fundamentals | Corona jet | Adenovirus |  |
| 157 | 2011 | https://doi.org/10.1088/0022-3727/44/50/505201 | *Zimmermann et al.* | Effects of cold atmospheric plasmas on adenoviruses in solution | Germany | Fundamentals | Surface DBD | * adenovirus |  |
| 158 | 2010 | https://doi.org/10.1002/ppap.200900088 | *Yasuda et al.* | Biological evaluation of DNA damage in bacteriophages inactivated by atmospheric pressure cold plasma | Japan | Surfaces | DBD | Λ phage | ND |
| 159 | 2009 | https://doi.org/10.1016/j.jcv.2009.03.017 | *Terrier O. et al.* | Cold oxygen plasma technology efficiency against different airborne respiratory viruses | France | Bioaerosols | Others | influenza virus type A, human parainfluenza virus type 3, RSV | 4 log reduction, 6.5 log reduction, 3.8 log reduction |
| 160 | 2007 | https://doi.org/10.1088/0022-3727/40/2/026 | *Nojima H. et al.* | Novel atmospheric pressure plasma device releasing atomic hydrogen: Reduction of microbial-contaminants and OH radicals in the air | Japan | Bioaerosols | Others | human influenza A virus | 2.39 log reduction |

* parts of the virus (e.g., proteins or RNA), or engineered viruses (e.g., such as pseudoviruses).

ND = Not Defined

D = Dry treatment

W = Wet treatment

B = Biological substrate

NB= Non-Biological substrate

The best result was reported in the case of studies with different results.
